# Supplementary material for: Influences of downward transport and photochemistry on surface ozone over East Antarctica during austral summer: in situ observations and model simulations
Source: Copernicus journal article supplement (doi:10.5194/egusphere-2023-1524), 2023-08-07
Supplement: Supplementary file 1 [file egusphere-2023-1524-supplement.pdf]

## Supplementary material

### **Influences of downward transport and photochemistry on surface ozone over East Antarctica during austral summer: in situ observations and model simulations**

Imran A. Girach<sup>1,2\*</sup>, Narendra Ojha<sup>3</sup>, Prabha R. Nair<sup>4,2</sup>, Kandula V. Subrahmanyam<sup>5,2</sup>, Neelakantan Koushik<sup>6</sup>, Mohammed M. Nazeer<sup>6</sup>, Nadimpally Kiran Kumar<sup>6</sup>, Surendran Nair Suresh Babu<sup>6</sup>, Jos Lelieveld<sup>7</sup>, and Andrea Pozzer<sup>7,8\*</sup>

<sup>1</sup>Space Applications Centre, Indian Space Research Organisation, Ahmedabad 380015, India

<sup>2</sup>Formerly at Space Physics Laboratory, Vikram Sarabhai Space Centre, Thiruvananthapuram 695022, India

<sup>3</sup>Space and Atmospheric Sciences Division, Physical Research Laboratory, Ahmedabad 380009, India

<sup>4</sup>TC 95/1185, Aiswarya Gardens, Kumarapuram, Thiruvananthapuram - 695011, India

<sup>5</sup>National Remote Sensing Centre, Indian Space Research Organisation, Hyderabad 500015, India

<sup>6</sup>Space Physics Laboratory, Vikram Sarabhai Space Centre, Thiruvananthapuram 695022, India

<sup>7</sup>Department of Atmospheric Chemistry, Max Planck Institute for Chemistry, Mainz 55128, Germany

<sup>8</sup>Climate and Atmosphere Research Center, The Cyprus Institute, Nicosia, Cyprus

\*Correspondence to: Imran A. Girach (imran.girach@gmail.com) and Andrea Pozzer (andrea.pozzer@mpic.de)

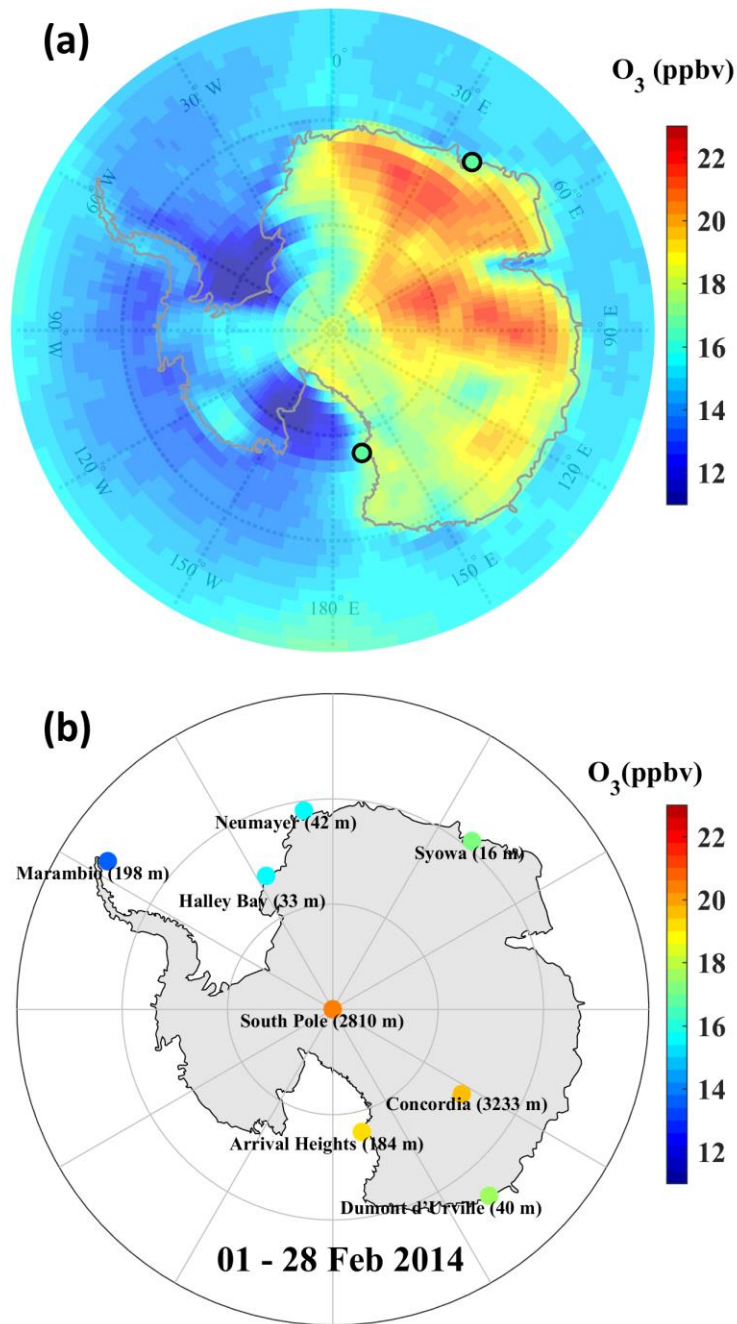

Figure S1: (a) Spatial distribution of EMAC simulated surface  $O_3$  averaged over the study period. Colour inside the black circle represent the average value from in situ measurements over Syowa and Arrival Heights. (b) Spatial distribution of in situ measured surface  $O_3$  averaged over 01–28 February 2014. Spatial heterogeneity in line with the distribution simulated with EMAC. (Surface ozone observations at Antarctic stations (South Pole, United States; Arrival Heights, New Zealand; Marambio, Argentina; Syowa station, Japan) were obtained from the World Data Centre for Reactive Gases (WDCRG), WMO's GAW (Global Atmosphere Watch; World Meteorological Organization) programme (<https://ebas.nilu.no/> and <https://ebas-data.nilu.no/Default.aspx>), and Legrand et al., 2016.

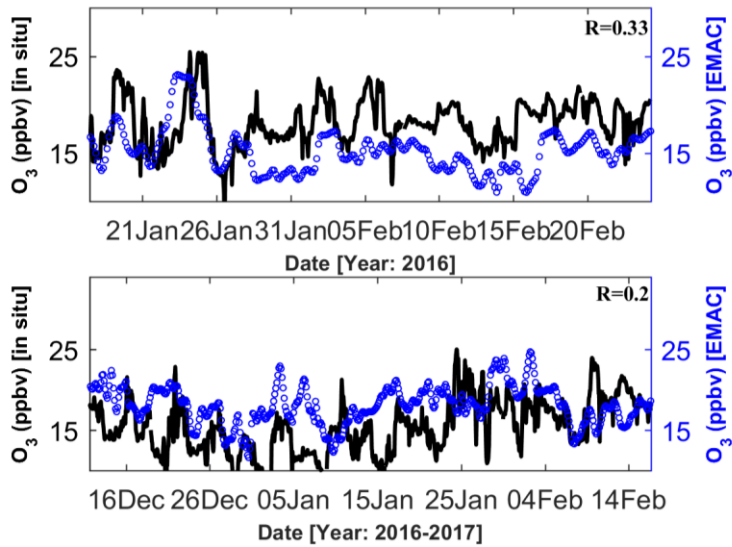

**Figure S2:** In situ (black) and EMAC simulated (blue) surface O<sub>3</sub> at Arrival Height during austral summer of 2016–2017.

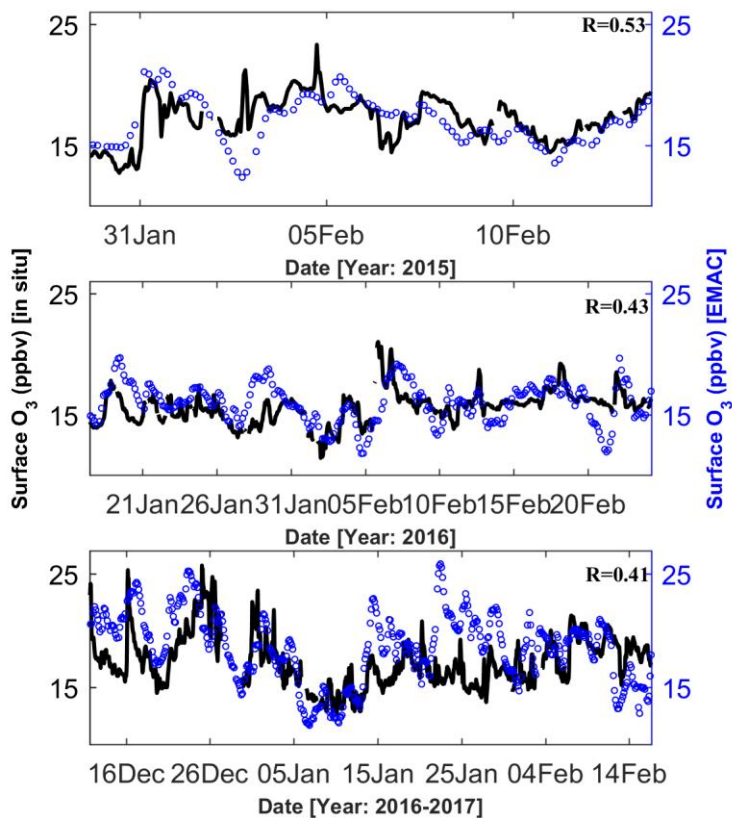

**Figure S3:** In situ (black) and EMAC simulated (blue) surface O<sub>3</sub> at Syowa during austral summer of 2016–2017.

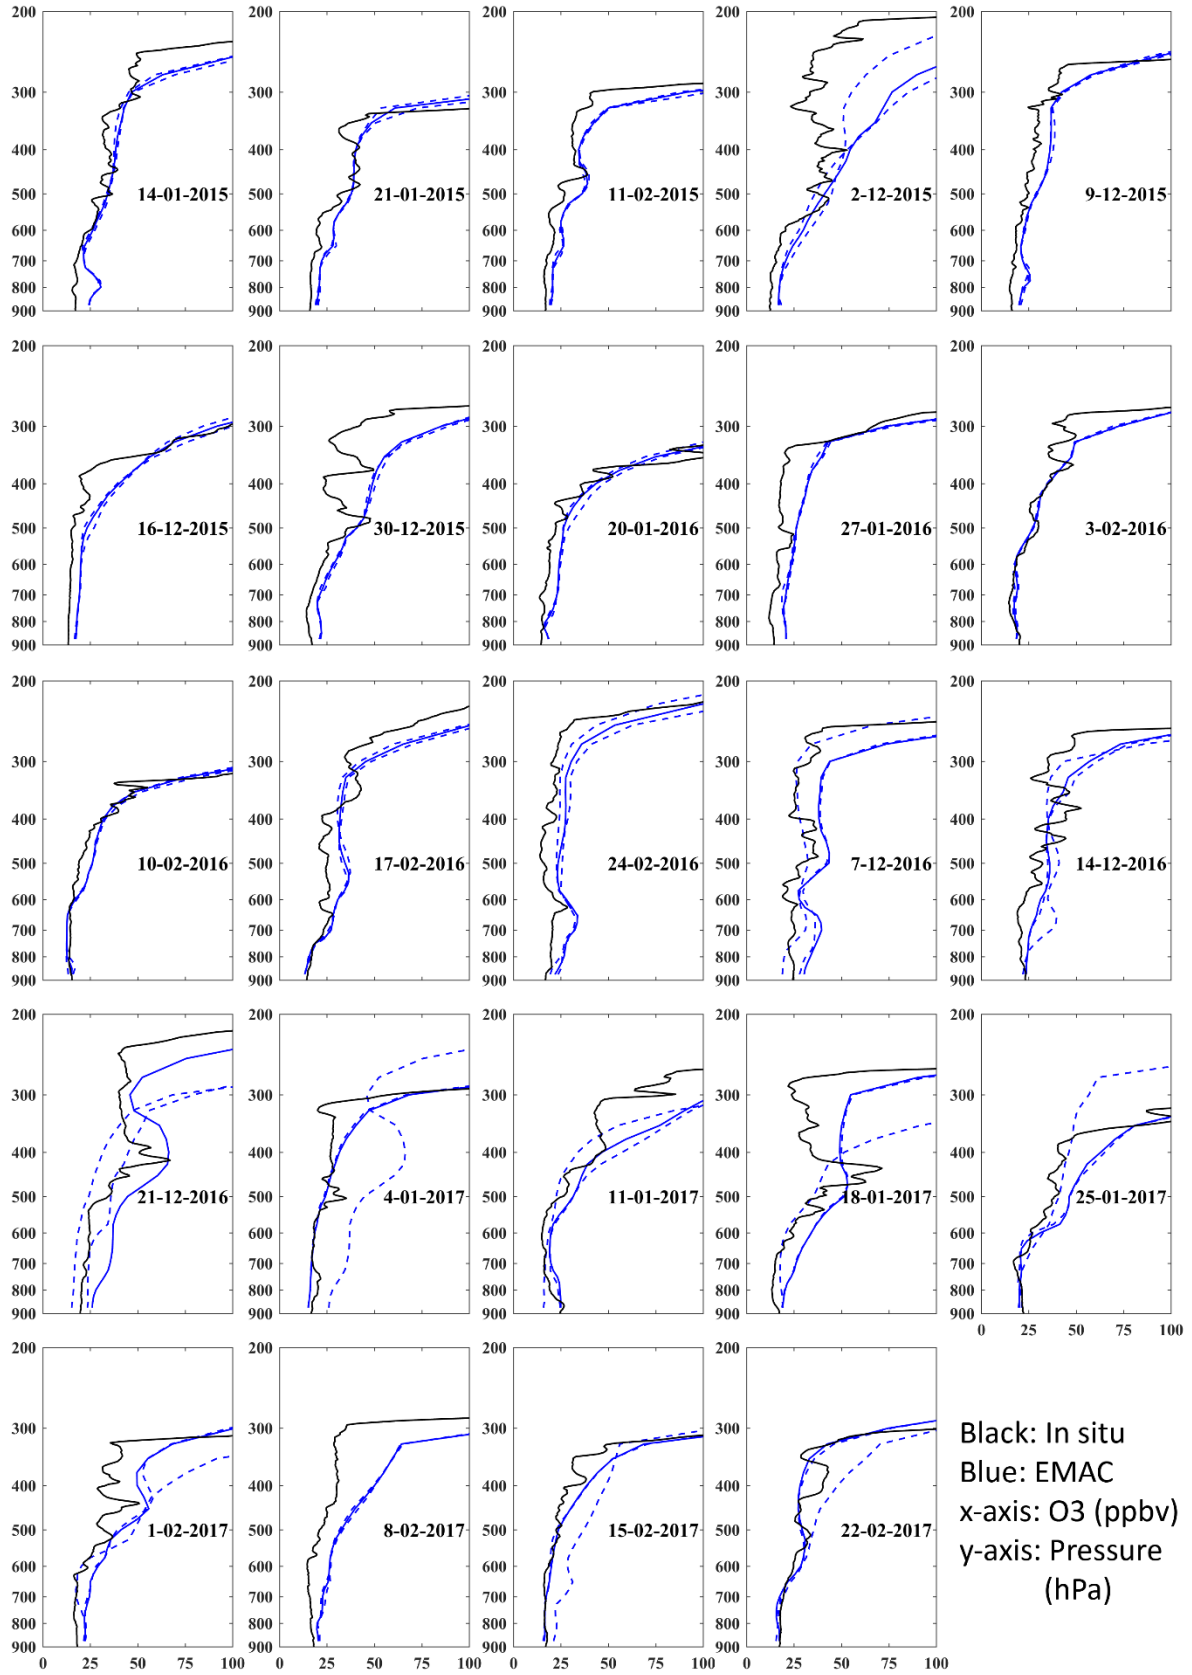

**Figure S4: In situ (black) and EMAC simulated (blue) vertical profile of O<sub>3</sub> at Davis station. Dashed blue curve 3h prior and after the time of ozonesonde launch.**

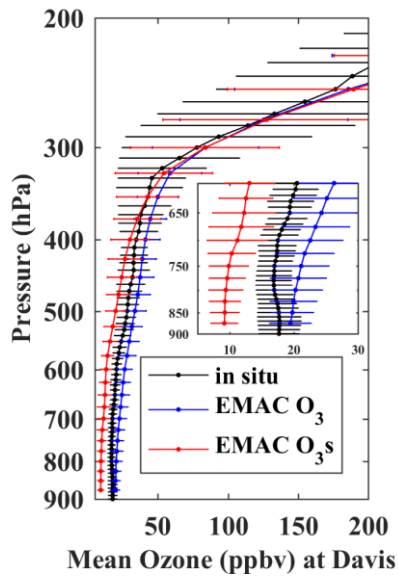

**Figure S5: Vertical distribution of O<sub>3</sub> (black: in situ and blue: EMAC) and O<sub>3</sub>s (red: EMAC) averaged over profiles shown in figure S4 at Davis station.**

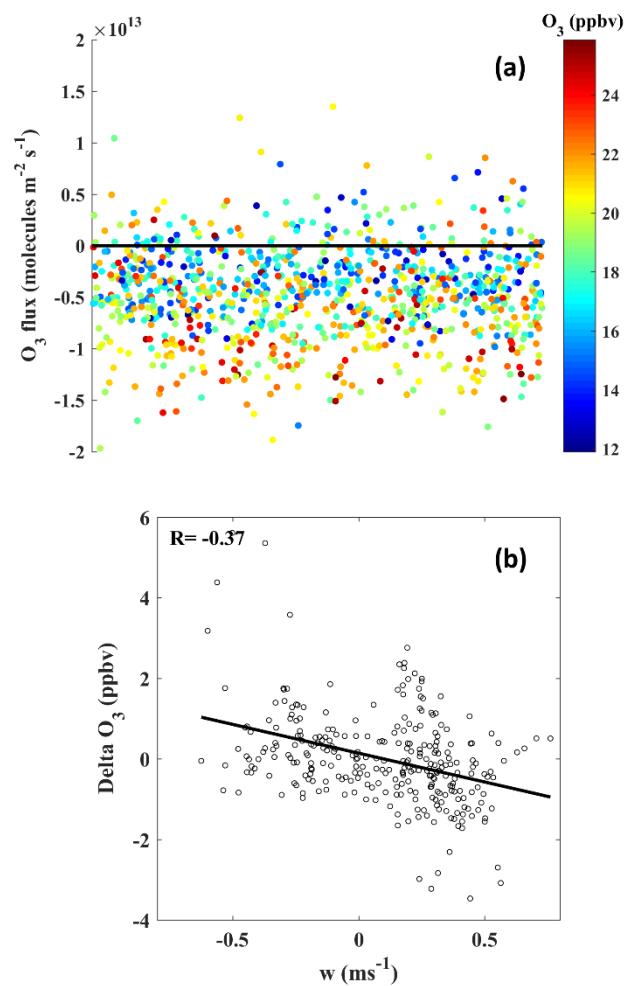

**Figure S6: (a) Distribution of measured O<sub>3</sub> mixing ratio with respect to EMAC simulated O<sub>3</sub> fluxes during the study period. Larger downward fluxes corresponding to**

frequent higher O<sub>3</sub> mixing ratio. (b) Scatter plot between in situ measured vertical wind and  $\Delta O_3$  during 18–29 January 2016.

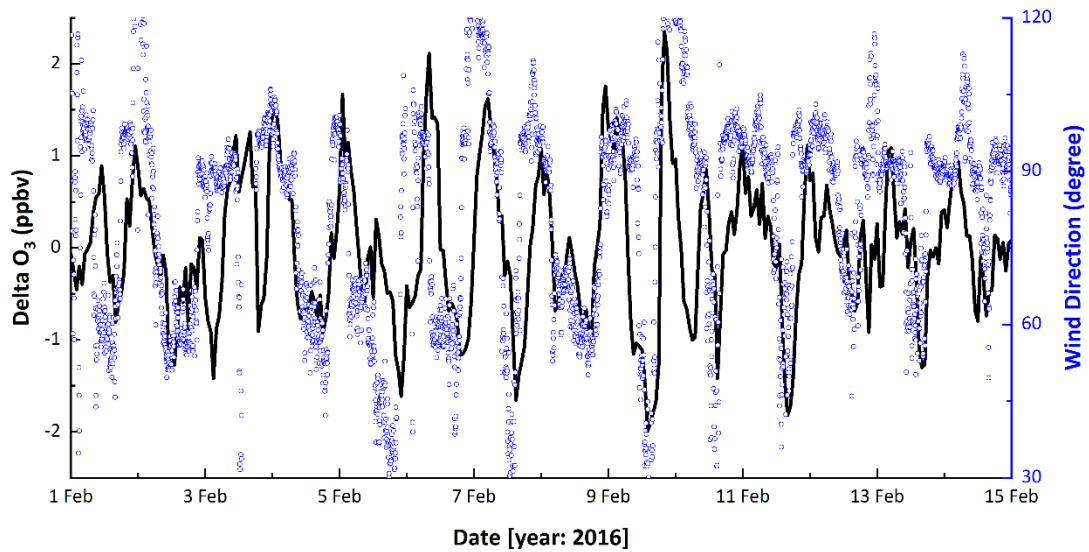

Figure S7: Variations in  $\Delta O_3$  and wind direction at Bharati during summer 2016.

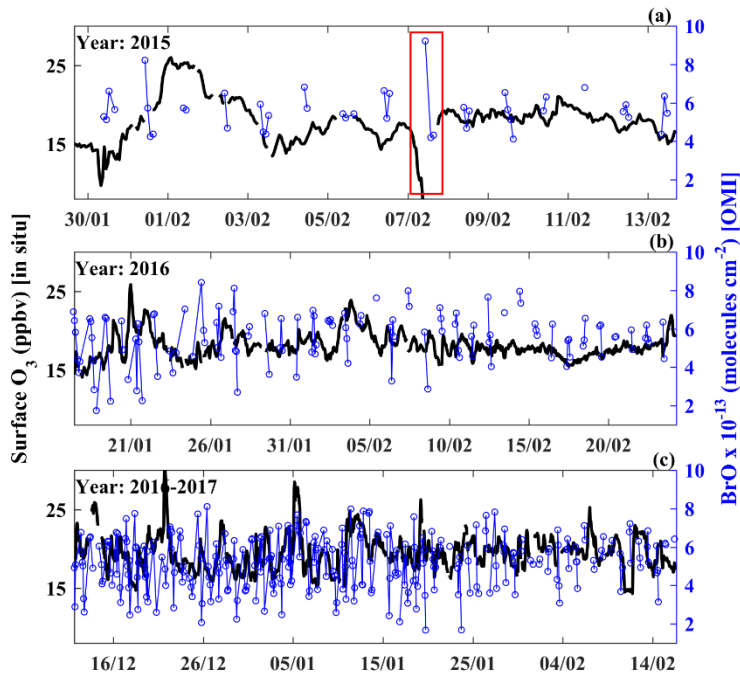

Figure S8: Variations in surface O<sub>3</sub> at Bharati and OMI-derived BrO column around Bharati ( $\pm 0.5^\circ$  latitude/longitude) during austral summer. Red rectangle mark the O<sub>3</sub> depletion event coinciding with enhanced BrO.

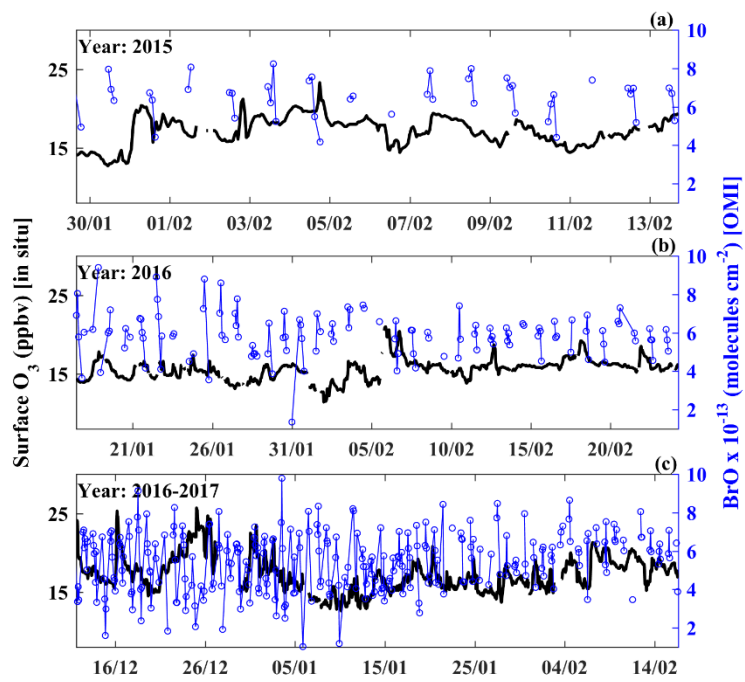

**Figure S9: Same as S8 but for Syowa station.**

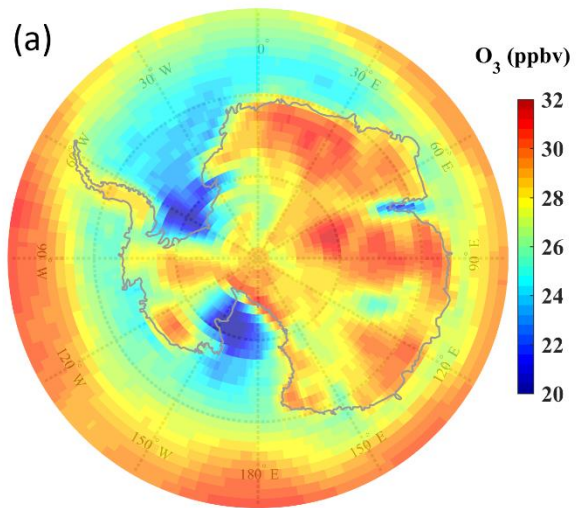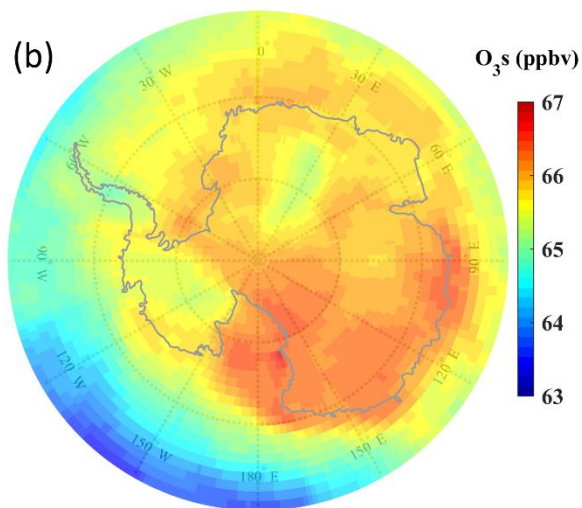

**Figure S10: EMAC simulated wintertime distribution of surface  $O_3$  and  $O_{3s}$  over the Antarctic region (July of 2015–2017).**

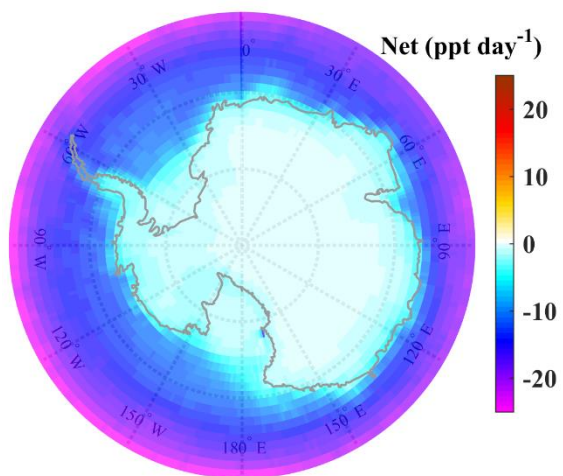

**Figure S11: Spatial distribution of net rate of change (production minus loss) of surface  $O_3$  due to photochemistry during winter (July of 2015–2017).**



## References

Legrand, M., Preunkert, S., Savarino, J., Frey, M. M., Kukui, A., Helmig, D., Jourdain, B., Jones, A. E., Weller, R., Brough, N., and Gallée, H.: Inter-annual variability of surface ozone at coastal (Dumont d'Urville, 2004–2014) and inland (Concordia, 2007–2014) sites in East Antarctica, *Atmos. Chem. Phys.*, 16, 8053-8069, doi: 10.5194/acp-16-8053-2016, 2016.
